# Supplementary material
Source: publisher figshare collection journal article supplement (https://asha.figshare.com/articles/dataset/_/19416488)
Supplement: Supplementary file 1 [file 1]

# Supplemental Material S1. Results of formal language pretesting for each participant.

| Measure                                                 | Participant |       |       |       |       | 6 (2) |
|---------------------------------------------------------|-------------|-------|-------|-------|-------|-------|
|                                                         | 1           | 2     | 3 (1) | 4     | 5     |       |
| Western Aphasia Battery                                 |             |       |       |       |       |       |
| Aphasia Quotient (/100)                                 | 69.5        | 70.3  |       | 57.6  | 53.7  |       |
| Fluency (/10)                                           | 4.0         | 4.0   |       | 4.0   | 4.0   |       |
| Comprehension (/10)                                     | 9.8         | 7.9   |       | 7.3   | 6.1   |       |
| Repetition (/10)                                        | 5.3         | 7.0   |       | 6.0   | 5.5   |       |
| Naming (/10)                                            | 7.7         | 7.3   |       | 5.5   | 4.3   |       |
| Cognitive Quotient (/100)                               | 78.0        | 70.7  |       | 60.8  | 56.8  |       |
| Reading (/10)                                           | 9.0         | 6.7   |       | 5.8   | 3.1   |       |
| Writing (/10)                                           | 4.9         | 5.0   |       | 4.8   | 4.9   |       |
| Praxis (/10)                                            | 10.0        | 7.0   |       | 7.2   | 8.2   |       |
| Construction (/10)                                      | 9.6         | 9.0   |       | 6.9   | 7.7   |       |
|                                                         |             |       |       |       |       |       |
| Philadelphia Comprehension Battery for Aphasia          |             |       |       |       |       |       |
| Lexical Comprehension (%)                               | 100         | 86    |       | 100   | 95    |       |
| Grammaticality Judgment (%)                             | 88          | 92    |       | 88    | 83    |       |
|                                                         |             |       |       |       |       |       |
| Northwestern University Sentence Comprehension Test (3) |             |       |       |       |       |       |
| Active/Subject relative (%)                             | 85/85       | 73/56 |       | 55/67 | 55/56 |       |
| Mean canonical                                          | 85          | 64.5  |       | 61    | 55.5  |       |
| Passive/Object relative                                 | 80/60       | 67/55 |       | 89/45 | 56/45 |       |
| Mean noncanonical                                       | 70          | 61    |       | 67    | 50.5  |       |

## Notes

1. P3 is not included here as this participant had experienced two neurological events.
2. The data from P6 are no longer available. This notwithstanding, he was recruited for the same protocol and so the authors are sure that he fit the criteria - Moderate Broca's with below normal performance on the sentence comprehension test.
3. Based on the binomial distribution ( $p = .05$ ), when  $9 \leq N \leq 1$  performance  $> 70\%$  correct is above chance, performance at or between 20% and 70% is at chance, performance below 20% is below chance. Underlined values represent performance at or below chance levels.
