# Supplementary material
Source: publisher figshare collection journal article supplement (https://asha.figshare.com/articles/dataset/_/19416488)
Supplement: Supplementary file 2 [file 1]

## Supplemental Material S2. Participant transcripts.

\$Subject

+KJB2cns1

+Subject = P1

+6/12/96

+coded by MT

+tape begins at 0.00

+ codes

-0.00

- 01 S oh boy  
S (uh) Cinderella (uh uh boy uh) want/s diamond ring  
S (uh oh boy uh uh uh) yes
- 02 = subject given book
- 03 S (s s) Cinderella and (one two) three boss/s and  
S word/s  
S (uh) wash (uh) clothes and (uh so uh) sock (uh)  
S (oh boy ca) gown
- 04 = examiner says tell me in a sentence.
- 05 S they want one (one one uh) gown  
S (uh) they want (one) two boss/s for (uh) X Cinderella  
= X sounds like attempt at Cinderella  
S wish (uh oh boy uh uh oh boy)  
S (s) Cinderella (one two three) four (uh four uh Cinder oh boy)  
S no  
S dance XXX
- 06 = examiner says what was that?
- 07 S (nik nik no no okay no no) shoe/s and slipper/s and (oh boy)  
S Cinderella (oh boy)
- 08 = examiner says tell me what they're doing
- 09 S (one t) two (bo) boss/s (oh boy) and dance (uh)  
S no  
S forever

S (uh) dance forever

+ tape ends

\$ Subject

Subject = P2

+ 06/28/96

+ tape begins

- 0:00

+ Cinderella narrative begins 4:46

01 S (I uh uh uh) down in the (uh uh uh um um) kitchen (I uh) Cinderella (I uh uh well I don't know but um) kutchen

= kitchen?

S but (uh) then (I uh) Cinderella (I uh um with a gue uh) with a guest but I uh oh uh uh

S Cinderella (I uh uh) ball (I think so uh ball) but (uh) twelve o'clock

S (I think so uh twelve o'clock I think so uh) no (twelve o'clock I think so uh X oh no but uh uh)

S Cinderella (I uh guess but uh) twelve o'clock (I guess but uh uh) breads\* (uh) brags\* Cinderella

= \* attempt at rags?

S rag/s but (I think so uh huh)

S (but I uh oh I with uh I don't know but) now (I uh oh uh with half I think so I don't know but uh I guess so)

S Cinderella (I guess so uh uh oh uh) dote on (uh uh uh) Galaxy (uh uh) with (uh Galacy no uh uh with uh Galace oh no uh uh)

02 = examiner prompts

03 S (uh) Cinderella (uh uh uh) with (uh mop I uh) mop (uh) three sister/s (I think so uh three sister/s but uh)

S Cinderella (I uh Cinderella I uh uh uh oh uh uh) with a mop (I guess) but kitchen (I think so mm hmm)

S with a kitchen (I uh with uh kitchen uh uh)

S Cinderella (I uh) wash the dish/es (mm hmm uh uh uh)

S barn (uh) but Cinderella (I uh uh with uh barn uh uh with a barn uh uh) dog (uh with a dog I uh uh oh uh)

S but (uh) with (uh) three sisters

S two sisters (I think so uh uh) ball (I think so mm hmm)

S but (uh) Cinderella stay home (uh stay home uh stay home I think so mm  
hmm)

S but then (I uh uh) with a ball Cinderella come/s to the ball (mm hmm mm  
hmm)

S (uh uh uh) Cinderella (I uh uh) put the (uh uh) dress (I think so mm hmm)

S (uh uh uh) Gala oh uh uh this one uh oh uh)

S Cinderella (I uh Galacy oh uh uh this one on man uh uh)

S Cinderella (I uh uh) with a man (I uh uh stranded uh uh) chanted (uh uh no  
uh chant uh channer no no uh chanted)

04 = examiner says enchanted?

05 S (yes yes yes)

S (but uh) twelve o'clock (I uh uh I don't know but I but don't but twelve o'clock  
I suppose uh uh twelve o'clock I guess but)

S this (dre uh uh heel I uh with uh heel I uh I gue oh chanted uh uh enchanted  
but uh oh uh uh chanted but uh know I don't uh with a chanted but uh)  
nowhere to be found

S (uh uh) chanted (but uh) no more (I don't know uh)

S this man (I don't know uh this man uh well I don't know uh)

S (oh uh) woman (I uh woman uh well I don't know uh oh uh)

S this (uh uh) woman (I uh with uh uh) get in the (uh uh uh) heel but (I expect I  
I uh uh too uh uh) too (uh uh) small

S (uh X coming uh but uh this uh) Cinderella (I uh uh) wear the (uh uh uh I uh  
toe I uh toe uh uh) heel

S (uh oh uh but uh) heel (uh) fit (uh fit) well

S (uh uh uh) with a man woman wed

+ tape ends

\$ Subject

Subject = P4

+ 1/3/97

= Red riding hood begins 0:25

01 S red riding hood (oh) mother go home and (t oh oh mother oh okay oh man  
oh)

S mother go home and (oh) go home and tell the dad your mother's home

S yes okay okay goodbye

S (oh) big thing (thing) yes

S sit down okay okay

S (do no) wolf X huff and puff no no no no no no

S hello yes oh goodbye goodbye okay big roses yes yes yes yes yes yes

S X okay yes wolf %knockknockknock %knockknockknock

S X no yes?

S oh grandmother grandmother yes?

S cut down okay

S okay big roses okay %dingdingding

S oh hello?

S hello

S okay yes okay oh what big eyes you X X

S yeh (goo) yes

S what mouth oh oh wolf oh my god X oh yeah yeah yeah

S man moustache red hair

S okay

S oh cut X stab one

S I forgot

S dead dead yes

S I don't know

02 = examiner prompts

03 S okay mother dog no (oh come on) cat

- S big cookie no cake yes  
S sit down  
S wolf
- 04 = examiner prompts
- 05 S wolf have sentences  
S goodbye  
S wolf  
S big (wo- rosebe no oh) man is squeezing (oh I can't) huff and puff and X no  
S I don't know
- 06 = examiner prompts
- 07 S yeah yeah yeah  
S %knockknockknock who's there  
S wolf oh man wolf  
S (oh huh oh) wolf bad okay  
S %knockknockknock okay  
S picks roses  
S (oh wolf bad oh) bad wolf yes  
S oh garbage though cake  
S man
- 08 = examiner prompts
- 09 S what?
- 10 = examiner says tell me in a sentence
- 11 S (oh) knife (nice knife yes)  
S I don't know  
S X sees her father and knife and dead  
= red riding hood?  
S grandmother  
S what's that?  
+ tape paused
- = Cinderella narrative begins 6:51
- 12 S Cinderella (yes)

S long time ago many years ago  
S what  
S wash the dishes sweep the floor sweat  
S (okay) oh ooh look at that oh made it oh good  
S oh more more okay  
S (oh) ugly no yeah yeah  
S yeah  
S (oh okay) goodbye  
= sniffs  
S crying crying oh oh  
S mother no no no no  
S maiden no no no (oh forgot)  
S (okay) maiden no witch no (oh come on)  
S I can't think of that word  
13 = examiner says call it something else  
14 S okay okay  
S maiden yeah yeah yeah maiden  
S big fat maiden  
S (oh oh mm wit no I can't okay)  
S golden slipper no  
S chariot? no  
15 = examiner prompts  
16 S yeah yeah  
S coachmen and Cinderella (okay)  
S %chchchchchch  
S a ball %chchchch  
S %dancing %today %dedededede (okay)  
S oh well X goodbye  
S oh good slipper all gone oh quick get X oh  
S %dingdingdingding  
S oh oh coach no gone  
S princess gone

- S X coach gone  
S horsie yeah all gone  
S (okay oh co- oh) Cinderella no no  
S prince (prince oh) glass slipper (oh)  
S go and see and make that wish come true  
S (okay) oh it's too hard too tight too loose too tight oh oh %oh oh no no oh no  
no yeah no  
S oh Cinderella oh too dirty dirty  
S okay %scht oh amazing oh amazing oh  
S prince X princess oh glass slipper good oh  
S married okay  
S (okay)  
17 = examiner asks more detail, complete sentences  
18 S yes yes yes  
S Cinderella two bitch no ugly  
S Cinderella made the dish wash  
S bird no horses stinky  
S (oh wh- no) dog and what's that spi- no  
S (okay)  
S oh nice nice  
S rip it down  
S (oh) horse dog prince Cinderella crying  
S (oh) yes oh Cinderella  
19 = examiner asks whats happening  
20 S what?  
S big  
S what that? yeah pri- no princess  
S yeah prince yeah dancing  
S (oh) %dingdingding  
S slipper all gone  
S X lost your shoe  
S (yes) princess go too tight too loose



- S lock the door
- S (okay) golden slipper (okay)
- S amazing oh
- S (yeah) princess princesses (okay)
- 21 = examiner asks what happened to them all
- 22 S (oh) %here %comes %the %bride
- + tape ends

\$Subject

+KJB3cns1

+Subject=P5

+6/10/96

+coded by MK

+ tape begins at 0.00

+ codes

- 01 = Cinderella begins 33:05  
S Cinderella  
S Cinderella (alright alright).
- 02 = examiner prompts
- 03 S Once upon a time (uh), Cinderella (uh) cook/ing and clean/ing and everything  
S (and uh miss misses uh uh), misses (uh) cute, (uh)  
S Lord have mercy  
S misses and (uh) miss and miss and (uh uh) Cinderella (uh) scrub/ing floor/s (and uh everything)  
S (uh) sew/ing and (uh) clean/ing up (and everything)  
S (and and uh when when) when the (uh uh miss) misses miss and miss and got up  
S (and uh s s) Cinderella cry cry cry  
S (and uh), (uh) oh beautiful gift/s  
S (and uh uh) big tall lady (big tall lady uh) give hurry back hurry (hurry back and uh uh s) Cinderella  
S (and uh uh sc- excuse me uh) Cinderella %dumdumdum  
= symbolizes dancing  
S (and) big tall handsome boy  
  
S (and uh uh prince) prince charming (and everything)  
  
S (and) all of a sudden and back again  
  
S (uh) Cinderella and (uh Cinderella and uh uh) hurry hurry hurry  
  
S (and uh uh) stop!  
  
S oh my goodness  
  
S shoe and oh no (no no no)  
  
S hurry back  
  
S (and uh and uh) %dumdumdumdum.  
  
S (uh uh) big tall (uh) handsome boy  
  
S no (no no).  
04 = KJB says different guy and MT repeats  
05 S hurry back  
S (and uh) oh my goodness  
S %dumdumdumdum.  
S (and uh) oh my goodness  
S trouble (trouble trouble)

S (and uh well) do/n't worry  
S (and) clean up (uh uh), pumpkin/s  
S (and uh well) do/n't worry  
S do/n't forget  
S (and uh a uh uh) %knockknockknock  
S (and) hello  
S (uh) misses (uh) and miss and miss and oh my goodness  
S (s s uh) shoe  
S (sh) one (s) shoe  
  
S (and uh)  
  
S (uh) stretch out and stretch out (and) and oh my goodness  
  
S (uh) miss and miss (miss) stretch out and stretch out and stretch out  
  
S (and uh uh) Cinderella (uh uh), (uh), prince (prince prince) oh my goodness  
  
S (and) X oh my goodness!  
  
S (s) shoe/s  
  
S (and) that/ 's enough  
  
S (uh) prince and Cinderella here come bride  
  
+ tape ends

\$ Subject

Subject = P6

+ 12/17/96

+ tape begins

- 0:00

+ Cinderella narrative begins 2:26

01 S (uh like) Cinderella is (uh uh and uh uh) maid in the (uh uh X maid in the uh uh uh)

S (uh uh pr) pronce

= prince?

S (uh uh l uh)

02 = examiner prompts

03 S (uh uh p uh pince uh no uh like uh)

04 = examiner prompts

05 S Pincerella (uh uh) and (uh uh uh m) maid

= Cinderella

S and then (uh uh X uh) Pindelella maid

S and (uh uh uh like uh coh uh like uh ah okay uh)

S (uh uh like uh okay uh uh uh X g uh that uh) gown

S good good gown

S and then (uh I don't know that that is uh X uh) the mother (uh) good

S and Pindelella there good (uh uh good uh)

S good uh like uh punskin (punchin) good (uh uh own) gown (and yeah)

= pumpkin?

S (uh uh like) pinsus (uh uh) good (uh cu uh good) good time (uh)

= princess?

S soo (uh soo soo and then uh yeah uh soo soo and yeah)

= shoe

S (uh uh like) pinsus I want to soo and (the the) then (uh like uh uh) the soo (uh uh like uh like uh like uh I don't know uh uh uh)

S boy (b buh uh) soo is (uh)

S (uh like s s b b) boy is (X uh)

S Cinderella soo

S and (uh) good (uh uh good uh uh like uh s s uh) soo (s soo soo X)

+ Redridinghood narrative begins 9:00

06 S (l w uh wh what is that)

07 = examiner says redridinghood

08 S (uh uh g g) girl (girl uh g girl) would (uh c c) coat

S girl (uh uh ca ca) cake (ca cake)

S then girl (uh uh uh ca uh uh girl uh like uh uh I don't know what they're doing)

S and (uh like uh uh that uh that is uh roof like uh roof)

09 = examiner says wolf

10 S (loof uh roof)

S (uh uh) and girl (girl) and roof (n I don't know what they're doing but uh)

S and then girl and roof (uh I don't nothing to do that)

S then (uh) girl (uh uh like uh uh X like uh uh like uh uh uh like) digging flowers in the

S then (uh uh uh like) voof and (d duh uh uh) coat

S then (uh b b boy no) mother is reading

S and then (uh) woof (uh d) door

S then (uh uh uh b boy uh buh duh uh like uh uh) woof is bad

S and then (uh w uh) girl is (uh X is uh uh XX) home

S (uh) girl is (uh uh b boy uh no girl is uh like uh) flowers in the (buh)

S and then (uh)

11 = examiner prompts

12 S (uh uh like uh uh) wolf is (uh uh uh) cake (cake)

S and then (uh uh uh like uh) hubber is the (uh n uh good pie gah gow cow X) good guy

= ?means mother

S and then (uh uh g) girl is (uh) and guy is nothing then (uh uh like uh like uh what is that)

13 = examiner says something

S and then (uh uh) wolf is good (uh w uh w uh uh I don't)

+ tape ends
